# Supplementary material
Source: PubMed Central journal article supplement (PMC10695640)
Supplement: kidney360-4-1536-s001.pdf [file kidney360-4-1536-s001.pdf]

**Supplemental Material****Table of Contents:**

- I. Supplemental Table 1: Diagnosis Code Categories
- II. Supplemental Table 2a: Cause-specific cox proportional hazards models for time to composite outcome of any stage AKI or RRT using ECMO start creatinine closest in absolute value without priority for pre-ECMO creatinine value  
  
Supplemental Table 2b: Cause-specific cox proportional hazards models for time to composite outcome of stage  $\geq 2$  AKI or RRT using ECMO start creatinine closest in absolute value without priority for pre-ECMO creatinine value
- III. Supplemental Table 3a: Cause-specific cox proportional hazards models for time to composite outcome of any stage AKI or RRT excluding patients without a serum creatinine value obtained in the 72 hours pre-ECMO  
  
Supplemental Table 3b: Cause-specific cox proportional hazards models for time to composite outcome of any  $\geq$  stage 2 AKI or RRT excluding patients without a serum creatinine value obtained in the 72 hours pre-ECMO
- IV. Supplemental Table 4a: Cause-specific cox proportional hazards models for time to composite outcome of all stage AKI or RRT using all eligible ECMO runs, with a single patient contributing multiple runs  
  
Supplemental Table 4b: Cause-specific cox proportional hazards models for time to composite outcome of stage  $\geq 2$  AKI or RRT using all eligible ECMO runs, with a single patient contributing multiple runs
- V. Supplemental Table 5a: Cause-specific cox proportional hazards models for time to composite outcome of all stage AKI or RRT after excluding patients with diagnosis code(s) consistent with CKD and known baseline eGFR  $< 90$  mL/min/1.73 m<sup>2</sup>  
  
Supplemental Table 5b: Cause-specific cox proportional hazards models for time to composite outcome of stage  $\geq 2$  AKI or RRT after excluding patients with diagnosis code(s) consistent with CKD and known baseline eGFR  $< 90$  mL/min/1.73 m<sup>2</sup>

**Supplemental Table 1: Diagnosis Code Categories****Cardiac Arrest**

|                          |                                                                                   |
|--------------------------|-----------------------------------------------------------------------------------|
| I46.9                    | Cardiac arrest, cause unspecified                                                 |
| 779.85                   | Cardiac arrest of newborn                                                         |
| P29.81                   | Cardiac arrest of newborn                                                         |
| I97.120                  | Postprocedural cardiac arrest following cardiac surgery                           |
| I46.8                    | Cardiac arrest due to other underlying condition                                  |
| I97.710                  | Intraoperative cardiac arrest during cardiac surgery                              |
| I46.2                    | Cardiac arrest due to underlying cardiac condition                                |
| I97.121                  | Postprocedural cardiac arrest following other surgery                             |
| Congenital Heart Disease |                                                                                   |
| 747.1                    | Coarctation of aorta (preductal) (postductal)                                     |
| 747                      | Patent ductus arteriosus                                                          |
| 397                      | Diseases of tricuspid valve                                                       |
| 746.7                    | Hypoplastic left heart syndrome                                                   |
| 745.5                    | Ostium secundum type atrial septal defect                                         |
| 746.89                   | Other specified congenital anomaly of heart                                       |
| Q23.4                    | Hypoplastic left heart syndrome                                                   |
| Q22.8                    | Other congenital malformations of tricuspid valve                                 |
| Q25.42                   | Hypoplasia of aorta                                                               |
| Q21.1                    | Atrial septal defect                                                              |
| Q23.8                    | Other congenital malformations of aortic and mitral valves                        |
| 747.39                   | Other anomalies of pulmonary artery and pulmonary circulation                     |
| 745                      | Bulbus cordis anomalies and anomalies of cardiac septal closure, common truncus   |
| 745.4                    | Ventricular septal defect                                                         |
| 424                      | Mitral valve disorders                                                            |
| Q23.1                    | Congenital insufficiency of aortic valve                                          |
| Q25.0                    | Patent ductus arteriosus                                                          |
| Q25.21                   | Interruption of aortic arch                                                       |
| Q21.0                    | Ventricular septal defect                                                         |
| Q23.3                    | Congenital mitral insufficiency                                                   |
| 747.22                   | Congenital atresia and stenosis of aorta                                          |
| 747.41                   | Total congenital anomalous pulmonary venous connection                            |
| 745.2                    | Tetralogy of Fallot                                                               |
| 745.3                    | Bulbus cordis anomalies and anomalies of cardiac septal closure, common ventricle |
| 747.49                   | Other congenital anomalies of great veins                                         |
| 747.42                   | Partial congenital anomalous pulmonary venous connection                          |
| 746.87                   | Congenital malposition of heart and cardiac apex                                  |
| Q22.0                    | Pulmonary valve atresia                                                           |
| Q22.6                    | Hypoplastic right heart syndrome                                                  |
| 746.83                   | Congenital infundibular pulmonic stenosis                                         |
| 745.1                    | Complete transposition of great vessels                                           |
| 746.85                   | Congenital coronary artery anomaly                                                |
| 746.01                   | Congenital atresia of pulmonary valve                                             |
| 746.1                    | Congenital tricuspid atresia and stenosis                                         |
| 747.3                    | Congenital anomalies of pulmonary artery                                          |
| 746.02                   | Congenital stenosis of pulmonary valve                                            |
| Q20.1                    | Double outlet right ventricle                                                     |
| Q20.3                    | Discordant ventriculoarterial connection                                          |
| Q25.8                    | Other congenital malformations of other great arteries                            |
| 745.61                   | Ostium primum defect                                                              |
| Q25.1                    | Coarctation of aorta                                                              |
| Q20.0                    | Common arterial trunk                                                             |
| Q25.79                   | Other congenital malformations of pulmonary artery                                |
| Q20.8                    | Other congenital malformations of cardiac chambers and connections                |
| Q24.8                    | Other specified congenital malformations of heart                                 |
| Q21.3                    | Tetralogy of Fallot                                                               |
| Q25.6                    | Stenosis of pulmonary artery                                                      |
| 745.11                   | Transposition of great vessels, double outlet right ventricle                     |
| 424.3                    | Pulmonary valve disorders                                                         |
| Q26.2                    | Total anomalous pulmonary venous connection                                       |
| Q21.2                    | Atrioventricular septal defect                                                    |
| Q23.2                    | Congenital mitral stenosis                                                        |
| Q20.4                    | Double inlet ventricle                                                            |
| Q22.5                    | Ebstein's anomaly                                                                 |
| Q24.3                    | Pulmonary infundibular stenosis                                                   |
| 746.3                    | Congenital stenosis of aortic valve                                               |
| 746.5                    | Congenital mitral stenosis                                                        |
| 746.09                   | Other congenital anomalies of pulmonary valve                                     |
| 747.21                   | Congenital anomaly of aortic arch                                                 |
| Q25.4                    | Other congenital malformations of aorta                                           |

|        |                                                                       |
|--------|-----------------------------------------------------------------------|
| Q25.49 | Other congenital malformations of aorta                               |
| Q24.5  | Malformation of coronary vessels                                      |
| Q24.6  | Congenital heart block                                                |
| Q26.8  | Other congenital malformations of great veins                         |
| 746.2  | Ebstein's anomaly                                                     |
| Q20.5  | Discordant atrioventricular connection                                |
| Q24.1  | Levocardia                                                            |
| 746.86 | Congenital heart block                                                |
| Q25.5  | Atresia of pulmonary artery                                           |
| Q22.3  | Other congenital malformations of pulmonary valve                     |
| Q24.2  | Cor triatriatum                                                       |
| 746.6  | Congenital mitral insufficiency                                       |
| Q24.9  | Congenital malformation of heart, unspecified                         |
| Q25.47 | Right aortic arch                                                     |
| 746.4  | Congenital insufficiency of aortic valve                              |
| 424.1  | Aortic valve disorders                                                |
| 747.11 | Congenital interruption of aortic arch                                |
| 747.5  | Congenital absence or hypoplasia of umbilical artery                  |
| 745.8  | Other bulbus cordis anomalies and anomalies of cardiac septal closure |
| Q22.4  | Congenital tricuspid stenosis                                         |
| Q24.0  | Dextrocardia                                                          |
| 424.2  | Tricuspid valve disorders, specified as nonrheumatic                  |
| Q23.0  | Congenital stenosis of aortic valve                                   |
| Q25.3  | Supravalvular aortic stenosis                                         |
| 394.2  | Mitral stenosis with insufficiency                                    |
| Q26.1  | Persistent left superior vena cava                                    |
| Q22.1  | Congenital pulmonary valve stenosis                                   |
| 747.4  | Congenital anomaly of great veins unspecified                         |
| 746.9  | Unspecified congenital anomaly of heart                               |
| Q25.45 | Double aortic arch                                                    |
| 396    | Mitral valve stenosis and aortic valve stenosis                       |
| Q24.4  | Congenital subaortic stenosis                                         |
| 394    | Mitral stenosis                                                       |
| Q26.3  | Partial anomalous pulmonary venous connection                         |
| Q25.71 | Coarctation of pulmonary artery                                       |
| 746.84 | Congenital obstructive anomalies of heart, not elsewhere classified   |
| Q20.6  | Isomerism of atrial appendages                                        |
| Q21.4  | Aortopulmonary septal defect                                          |

#### Other Cardiac Dysfunction

---

|         |                                                                    |
|---------|--------------------------------------------------------------------|
| I42.8   | Other cardiomyopathies                                             |
| I50.9   | Heart failure, unspecified                                         |
| 427.89  | Other specified cardiac dysrhythmias                               |
| 427.41  | Ventricular fibrillation                                           |
| 428     | Congestive heart failure, unspecified                              |
| 426.11  | First degree atrioventricular block                                |
| I31.3   | Pericardial effusion (noninflammatory)                             |
| I40.9   | Acute myocarditis, unspecified                                     |
| I40.0   | Infective myocarditis                                              |
| 423.3   | Cardiac tamponade                                                  |
| 428.22  | Chronic systolic heart failure                                     |
| 425.4   | Other primary cardiomyopathies                                     |
| 421     | Acute and subacute bacterial endocarditis                          |
| 422.91  | Idiopathic myocarditis                                             |
| 427.32  | Atrial flutter                                                     |
| 427.1   | Paroxysmal ventricular tachycardia                                 |
| 429.3   | Cardiomegaly                                                       |
| 785.51  | Cardiogenic shock                                                  |
| I34.0   | Nonrheumatic mitral (valve) insufficiency                          |
| I31.4   | Cardiac tamponade                                                  |
| I97.130 | Postprocedural heart failure following cardiac surgery             |
| I50.23  | Acute on chronic systolic (congestive) heart failure               |
| I50.20  | Unspecified systolic (congestive) heart failure                    |
| 421.9   | Acute endocarditis, unspecified                                    |
| I31.2   | Hemopericardium, not elsewhere classified                          |
| I42.2   | Other hypertrophic cardiomyopathy                                  |
| 426     | Atrioventricular block, complete                                   |
| P29.89  | Other cardiovascular disorders originating in the perinatal period |
| 422.99  | Other acute myocarditis                                            |
| 428.1   | Left heart failure                                                 |
| 427.69  | Other premature beats                                              |
| 423     | Hemopericardium                                                    |

|         |                                                                                                                         |
|---------|-------------------------------------------------------------------------------------------------------------------------|
| 428.9   | Heart failure, unspecified                                                                                              |
| 427     | Paroxysmal supraventricular tachycardia                                                                                 |
| I24.8   | Other forms of acute ischemic heart disease                                                                             |
| I50.21  | Acute systolic (congestive) heart failure                                                                               |
| I30.1   | Infective pericarditis                                                                                                  |
| I43     | Cardiomyopathy in diseases classified elsewhere                                                                         |
| I50.810 | Right heart failure, unspecified                                                                                        |
| 427.61  | Supraventricular premature beats                                                                                        |
| 424.9   | Endocarditis, valve unspecified, unspecified cause                                                                      |
| 426.13  | Other second-degree atrioventricular block                                                                              |
| 429     | Myocarditis, unspecified                                                                                                |
| I50.1   | Left ventricular failure, unspecified                                                                                   |
| 428.21  | Acute systolic heart failure                                                                                            |
| 427.9   | Cardiac dysrhythmia, unspecified                                                                                        |
| 423.9   | Unspecified disease of pericardium                                                                                      |
| 427.81  | Sinoatrial node dysfunction                                                                                             |
| 423.8   | Other specified diseases of pericardium                                                                                 |
| P29.0   | Neonatal cardiac failure                                                                                                |
| I40.8   | Other acute myocarditis                                                                                                 |
| I31.8   | Other specified diseases of pericardium                                                                                 |
| I42.0   | Dilated cardiomyopathy                                                                                                  |
| 415     | Acute cor pulmonale                                                                                                     |
| I36.1   | Nonrheumatic tricuspid (valve) insufficiency                                                                            |
| 420.9   | Acute pericarditis, unspecified                                                                                         |
| 422.9   | Acute myocarditis, unspecified                                                                                          |
| I51.4   | Myocarditis, unspecified                                                                                                |
| I50.814 | Right heart failure due to left heart failure                                                                           |
| 410.91  | Acute myocardial infarction, unspecified site, initial episode of care                                                  |
| 429.9   | Heart disease, unspecified                                                                                              |
| 412     | Old myocardial infarction                                                                                               |
| I51.7   | Cardiomegaly                                                                                                            |
| I38     | Endocarditis, valve unspecified                                                                                         |
| I51.9   | Heart disease, unspecified                                                                                              |
| 425.8   | Cardiomyopathy in other diseases classified elsewhere                                                                   |
| 428.3   | Unspecified diastolic heart failure                                                                                     |
| I35.1   | Nonrheumatic aortic (valve) insufficiency                                                                               |
| 414.01  | Coronary atherosclerosis of native coronary artery                                                                      |
| I42.9   | Cardiomyopathy, unspecified                                                                                             |
| 429.89  | Other ill-defined heart disease                                                                                         |
| I40.1   | Isolated myocarditis                                                                                                    |
| I51.89  | Other ill-defined heart diseases                                                                                        |
| I34.2   | Nonrheumatic mitral (valve) stenosis                                                                                    |
| I35.0   | Nonrheumatic aortic (valve) stenosis                                                                                    |
| I50.89  | Other heart failure                                                                                                     |
| I50.32  | Chronic diastolic (congestive) heart failure                                                                            |
| 425.3   | Endocardial fibroelastosis                                                                                              |
| 411.81  | Acute coronary occlusion without myocardial infarction                                                                  |
| I33.0   | Acute and subacute infective endocarditis                                                                               |
| I50.33  | Acute on chronic diastolic (congestive) heart failure                                                                   |
| I23.6   | Thrombosis of atrium, auricular appendage, and ventricle as current complications following acute myocardial infarction |
| 422     | Acute myocarditis in diseases classified elsewhere                                                                      |
| 429.71  | Acquired cardiac septal defect                                                                                          |
| 998.01  | Postoperative shock, cardiogenic                                                                                        |
| I50.40  | Unspecified combined systolic (congestive) and diastolic (congestive) heart failure                                     |
| I50.82  | Biventricular heart failure                                                                                             |
| I97.110 | Postprocedural cardiac insufficiency following cardiac surgery                                                          |
| 426.9   | Conduction disorder, unspecified                                                                                        |
| I27.22  | Pulmonary hypertension due to left heart disease                                                                        |
| I21.A9  | Other myocardial infarction type                                                                                        |
| I50.813 | Acute on chronic right heart failure                                                                                    |
| 414.8   | Other specified forms of chronic ischemic heart disease                                                                 |
| 426.1   | Atrioventricular block, unspecified                                                                                     |
| 425.7   | Nutritional and metabolic cardiomyopathy                                                                                |
| I42.4   | Endocardial fibroelastosis                                                                                              |
| 427.31  | Atrial fibrillation                                                                                                     |
| 427.2   | Paroxysmal tachycardia, unspecified                                                                                     |
| 423.2   | Constrictive pericarditis                                                                                               |
| 426.4   | Right bundle branch block                                                                                               |
| I34.1   | Nonrheumatic mitral (valve) prolapse                                                                                    |
| I37.8   | Other nonrheumatic pulmonary valve disorders                                                                            |
| 426.5   | Bundle branch block, unspecified                                                                                        |

|                           |                                                                                        |
|---------------------------|----------------------------------------------------------------------------------------|
| I24.0                     | Acute coronary thrombosis not resulting in myocardial infarction                       |
| 428.4                     | Unspecified combined systolic and diastolic heart failure                              |
| 425.18                    | Other hypertrophic cardiomyopathy                                                      |
| I42.1                     | Obstructive hypertrophic cardiomyopathy                                                |
| I34.8                     | Other nonrheumatic mitral valve disorders                                              |
| 429.4                     | Functional disturbances following cardiac surgery                                      |
| 426.7                     | Anomalous atrioventricular excitation                                                  |
| I50.41                    | Acute combined systolic (congestive) and diastolic (congestive) heart failure          |
| 426.82                    | Long QT syndrome                                                                       |
| CDH                       |                                                                                        |
| Q79.0                     | Congenital diaphragmatic hernia                                                        |
| PPHN                      |                                                                                        |
| P29.30                    | Pulmonary hypertension of newborn                                                      |
| I27.0                     | Primary pulmonary hypertension                                                         |
| 416                       | Primary pulmonary hypertension                                                         |
| Meconium Aspiration       |                                                                                        |
| 770.12                    | Meconium aspiration with respiratory symptoms                                          |
| P24.01                    | Meconium aspiration with respiratory symptoms                                          |
| 770.11                    | Meconium aspiration without respiratory symptoms                                       |
| Acute Respiratory Failure |                                                                                        |
| 770.18                    | Other fetal and newborn aspiration with respiratory symptoms                           |
| J96.91                    | Respiratory failure, unspecified with hypoxia                                          |
| J96.00                    | Acute respiratory failure, unspecified whether with hypoxia or hypercapnia             |
| 770.84                    | Respiratory failure of newborn                                                         |
| 799.1                     | Respiratory arrest                                                                     |
| P28.5                     | Respiratory failure of newborn                                                         |
| 518.84                    | Acute and chronic respiratory failure                                                  |
| 770.89                    | Other respiratory problems after birth                                                 |
| 518.51                    | Acute respiratory failure following trauma and surgery                                 |
| J95.1                     | Acute pulmonary insufficiency following thoracic surgery                               |
| J96.21                    | Acute and chronic respiratory failure with hypoxia                                     |
| J96.01                    | Acute respiratory failure with hypoxia                                                 |
| 770.87                    | Respiratory arrest of newborn                                                          |
| 770.88                    | Hypoxemia of newborn                                                                   |
| J96.20                    | Acute and chronic respiratory failure, unspecified whether with hypoxia or hypercapnia |
| J96.02                    | Acute respiratory failure with hypercapnia                                             |
| J95.2                     | Acute pulmonary insufficiency following nonthoracic surgery                            |
| J96.90                    | Respiratory failure, unspecified, unspecified whether with hypoxia or hypercapnia      |
| J80                       | Acute respiratory distress syndrome                                                    |
| P28.81                    | Respiratory arrest of newborn                                                          |
| J95.821                   | Acute postprocedural respiratory failure                                               |
| J96.22                    | Acute and chronic respiratory failure with hypercapnia                                 |
| Pneumonia/Pneumonitis     |                                                                                        |
| J18.9                     | Pneumonia, unspecified organism                                                        |
| J95.851                   | Ventilator associated pneumonia                                                        |
| J21.0                     | Acute bronchiolitis due to respiratory syncytial virus                                 |
| 482.41                    | Methicillin susceptible pneumonia due to Staphylococcus aureus                         |
| 480.8                     | Pneumonia due to other virus not elsewhere classified                                  |
| J20.9                     | Acute bronchitis, unspecified                                                          |
| J12.3                     | Human metapneumovirus pneumonia                                                        |
| J10.82                    | Influenza due to other identified influenza virus with myocarditis                     |
| 488.1                     | Influenza due to identified 2009 H1N1 influenza virus                                  |
| 482.42                    | Methicillin resistant pneumonia due to Staphylococcus aureus                           |
| J69.0                     | Pneumonitis due to inhalation of food and vomit                                        |
| 487.1                     | Influenza with other respiratory manifestations                                        |
| 486                       | Pneumonia, organism unspecified                                                        |
| 466.11                    | Acute bronchiolitis due to respiratory syncytial virus (RSV)                           |
| 480.1                     | Pneumonia due to respiratory syncytial virus                                           |
| 507                       | Pneumonitis due to inhalation of food or vomitus                                       |
| J12.0                     | Adenoviral pneumonia                                                                   |
| J11.1                     | Influenza due to unidentified influenza virus with other respiratory manifestations    |
| P23.2                     | Congenital pneumonia due to Staphylococcus                                             |
| 770                       | Congenital pneumonia                                                                   |
| 33                        | Whooping cough due to Bordetella pertussis (p. pertussis)                              |
| 466.19                    | Acute bronchiolitis due to other infectious organisms                                  |
| 480                       | Pneumonia due to adenovirus                                                            |
| J12.2                     | Parainfluenza virus pneumonia                                                          |
| 488.11                    | Influenza due to identified 2009 H1N1 influenza virus with pneumonia                   |
| 112.4                     | Candidiasis of lung                                                                    |
| 480.9                     | Viral pneumonia, unspecified                                                           |
| 482.84                    | Legionnaires' disease                                                                  |

|               |                                                                                                            |
|---------------|------------------------------------------------------------------------------------------------------------|
| 507.1         | Pneumonitis due to inhalation of oils and essences                                                         |
| J15.1         | Pneumonia due to Pseudomonas                                                                               |
| J12.1         | Respiratory syncytial virus pneumonia                                                                      |
| J13           | Pneumonia due to Streptococcus pneumoniae                                                                  |
| J21.1         | Acute bronchiolitis due to human metapneumovirus                                                           |
| J21.8         | Acute bronchiolitis due to other specified organisms                                                       |
| J12.89        | Other viral pneumonia                                                                                      |
| 33.9          | Whooping cough, unspecified organism                                                                       |
| 487           | Influenza with pneumonia                                                                                   |
| 487.8         | Influenza with other manifestations                                                                        |
| J15.0         | Pneumonia due to Klebsiella pneumoniae                                                                     |
| J15.211       | Pneumonia due to methicillin susceptible Staphylococcus aureus                                             |
| 482.1         | Pneumonia due to Pseudomonas                                                                               |
| J15.7         | Pneumonia due to Mycoplasma pneumoniae                                                                     |
| J10.08        | Influenza due to other identified influenza virus with other specified pneumonia                           |
| A31.0         | Pulmonary mycobacterial infection                                                                          |
| J10.01        | Influenza due to other identified influenza virus with the same other identified influenza virus pneumonia |
| 480.2         | Pneumonia due to parainfluenza virus                                                                       |
| J16.8         | Pneumonia due to other specified infectious organisms                                                      |
| 31            | Pulmonary diseases due to other mycobacteria                                                               |
| 484.6         | Pneumonia in aspergillosis                                                                                 |
| 482.4         | Pneumonia due to Staphylococcus, unspecified                                                               |
| J15.8         | Pneumonia due to other specified bacteria                                                                  |
| 482           | Pneumonia due to Klebsiella pneumoniae                                                                     |
| 483.8         | Pneumonia due to other specified organism                                                                  |
| P23.6         | Congenital pneumonia due to other bacterial agents                                                         |
| 484.1         | Pneumonia in cytomegalic inclusion disease                                                                 |
| 482.32        | Pneumonia due to Streptococcus, group b                                                                    |
| 484.7         | Pneumonia in other systemic mycoses                                                                        |
| 482.9         | Bacterial pneumonia, unspecified                                                                           |
| 483           | Pneumonia due to Mycoplasma pneumoniae                                                                     |
| 482.83        | Pneumonia due to other gram-negative bacteria                                                              |
| Sepsis        |                                                                                                            |
| A41.9         | Sepsis, unspecified organism                                                                               |
| P36.9         | Bacterial sepsis of newborn, unspecified                                                                   |
| 785.52        | Septic shock                                                                                               |
| 995.92        | Severe sepsis                                                                                              |
| 38.49         | Other septicemia due to Gram-negative organism                                                             |
| 38.19         | Other staphylococcal septicemia                                                                            |
| 771.83        | Bacteremia of newborn                                                                                      |
| 995.9         | Systemic inflammatory response syndrome, unspecified                                                       |
| A41.89        | Other specified sepsis                                                                                     |
| 995.91        | Sepsis, unspecified                                                                                        |
| P36.0         | Sepsis of newborn due to Streptococcus, group b                                                            |
| 38.9          | Unspecified septicemia                                                                                     |
| 38            | Streptococcal septicemia                                                                                   |
| 38.42         | Septicemia due to Escherichia coli (E. coli)                                                               |
| 38.11         | Methicillin susceptible Staphylococcus aureus septicemia                                                   |
| P36.8         | Other bacterial sepsis of newborn                                                                          |
| A41.81        | Sepsis due to Enterococcus                                                                                 |
| A41.52        | Sepsis due to Pseudomonas                                                                                  |
| A40.0         | Sepsis due to Streptococcus, group A                                                                       |
| A41.01        | Sepsis due to methicillin susceptible Staphylococcus aureus                                                |
| A40.1         | Sepsis due to Streptococcus, group B                                                                       |
| 38.44         | Septicemia due to Serratia                                                                                 |
| P36.4         | Sepsis of newborn due to Escherichia coli                                                                  |
| 38.43         | Septicemia due to Pseudomonas                                                                              |
| A41.53        | Sepsis due to Serratia                                                                                     |
| A41.50        | Gram-negative sepsis, unspecified                                                                          |
| P36.39        | Sepsis of newborn due to other staphylococci                                                               |
| A41.51        | Sepsis due to Escherichia coli (e. coli)                                                                   |
| Oncologic/BMT |                                                                                                            |
| 202.8         | Other malignant lymphomas, unspecified site, extranodal and solid organ sites                              |
| T86.5         | Complications of stem cell transplant                                                                      |
| C41.4         | Malignant neoplasm of pelvic bones, sacrum and coccyx                                                      |
| C78.00        | Secondary malignant neoplasm of unspecified lung                                                           |
| 204.01        | Acute lymphoid leukemia in remission                                                                       |
| 201.98        | Hodgkin's disease, unspecified type, of lymph nodes of multiple sites                                      |
| C91.00        | Acute lymphoblastic leukemia not having achieved remission                                                 |
| C83.78        | Burkitt lymphoma, lymph nodes of multiple sites                                                            |
| V42.81        | Bone marrow replaced by transplant                                                                         |
| 191.6         | Malignant neoplasm of cerebellum NOS                                                                       |

|                               |                                                                                                        |
|-------------------------------|--------------------------------------------------------------------------------------------------------|
| C91.02                        | Acute lymphoblastic leukemia, in relapse                                                               |
| Z94.84                        | Stem cells transplant status                                                                           |
| 204                           | Acute lymphoid leukemia, without mention of having achieved remission                                  |
| 198.82                        | Secondary malignant neoplasm of genital organs                                                         |
| C92.00                        | Acute myeloblastic leukemia, not having achieved remission                                             |
| C92.30                        | Myeloid sarcoma, not having achieved remission                                                         |
| C92.Z1                        | Other myeloid leukemia, in remission                                                                   |
| C79.89                        | Secondary malignant neoplasm of other specified sites                                                  |
| C77.9                         | Secondary and unspecified malignant neoplasm of lymph node, unspecified                                |
| Z94.81                        | Bone marrow transplant status                                                                          |
| <b>Solid Organ Transplant</b> |                                                                                                        |
| 996.83                        | Complications of transplanted heart                                                                    |
| T86.298                       | Other complications of heart transplant                                                                |
| T86.818                       | Other complications of lung transplant                                                                 |
| T86.21                        | Heart transplant rejection                                                                             |
| V45.87                        | Transplanted organ removal status                                                                      |
| Z94.1                         | Heart transplant status                                                                                |
| T86.810                       | Lung transplant rejection                                                                              |
| 996.84                        | Complications of transplanted lung                                                                     |
| V42.7                         | Liver replaced by transplant                                                                           |
| 996.89                        | Complications of other transplanted organ                                                              |
| V42.1                         | Heart replaced by transplant                                                                           |
| T86.22                        | Heart transplant failure                                                                               |
| <b>CKD/CAKUT</b>              |                                                                                                        |
| 585.6                         | End stage renal disease                                                                                |
| 593.9                         | Unspecified disorder of kidney and ureter                                                              |
| 753.29                        | Other congenital obstructive defect of renal pelvis and ureter                                         |
| N18.2                         | Chronic kidney disease, stage 2 (mild)                                                                 |
| N99.0                         | Postprocedural (acute) (chronic) kidney failure                                                        |
| 593.89                        | Other specified disorder of kidney and ureter                                                          |
| 753.3                         | Other specified congenital anomaly of kidney                                                           |
| N18.9                         | Chronic kidney disease, unspecified                                                                    |
| 753.8                         | Other specified congenital anomaly of bladder and urethra                                              |
| E72.04                        | Cystinosis                                                                                             |
| 753.15                        | Congenital renal dysplasia                                                                             |
| 753.22                        | Congenital obstruction of ureterovesical junction                                                      |
| 753                           | Congenital renal agenesis and dysgenesis                                                               |
| N18.6                         | End stage renal disease                                                                                |
| 753.9                         | Unspecified congenital anomaly of urinary system                                                       |
| 403.91                        | Unspecified hypertensive kidney disease with chronic kidney disease stage V or end stage renal disease |

**Supplemental Table 2a: Cause-specific cox proportional hazards models for time to composite outcome of any stage AKI or RRT using ECMO start creatinine closest in absolute value without priority for pre-ECMO creatinine value**

|                                                 | Model 1: Plasma Free Hemoglobin (mg/dL)<br>(ref: unmeasured value) |                   |       | Model 2: LDH (U/L)<br>(ref: unmeasured value) |                  |       | Model 3: Minimum Platelets (per 100/uL) |                  | Model 4: Minimum Hemoglobin (per 1 g/dl) |                  |       |
|-------------------------------------------------|--------------------------------------------------------------------|-------------------|-------|-----------------------------------------------|------------------|-------|-----------------------------------------|------------------|------------------------------------------|------------------|-------|
|                                                 | HR (95% CI)                                                        |                   | p     | HR (95% CI)                                   |                  | p     | HR (95% CI)                             | p                | HR (95% CI)                              | p                |       |
| <b>Hemolysis Marker</b>                         | <50                                                                | 0.45 (0.06-3.35)  | 0.43  | <2500                                         | 1.08 (0.33-3.49) | 0.90  | 0.96 (0.92-1.00)                        | 0.03             | 0.94 (0.87-1.03)                         | 0.17             |       |
|                                                 | >50                                                                | 3.07 (1.54-6.10)  | <0.01 | >2500                                         | 2.41 (1.28-4.51) | 0.01  |                                         |                  |                                          |                  |       |
| <b>Age<sup>a</sup> (ref: &lt;1 month)</b>       |                                                                    |                   | <0.01 |                                               |                  | <0.01 |                                         | <0.01            |                                          | <0.01            |       |
| <b>1 month – 1 year</b>                         |                                                                    | 1.71 (1.02-2.85)  |       |                                               | 1.65 (0.99-2.75) |       |                                         | 1.76 (1.05-2.94) |                                          | 1.67 (1.00-2.80) |       |
| <b>&gt;1 year – 5 years</b>                     |                                                                    | 1.82 (1.03-3.23)  |       |                                               | 1.80 (1.02-3.17) |       |                                         | 2.07 (1.16-3.70) |                                          | 1.80 (1.01-3.21) |       |
| <b>&gt;5 years – 12 years</b>                   |                                                                    | 2.97 (1.50-5.91)  |       |                                               | 2.83 (1.42-5.63) |       |                                         | 3.55 (1.77-7.14) |                                          | 2.80 (1.39-5.62) |       |
| <b>&gt;12 years – 18 years</b>                  |                                                                    | 3.90 (1.97-7.70)  |       |                                               | 3.81 (1.96-7.42) |       |                                         | 4.38 (2.18-8.80) |                                          | 3.60 (1.82-7.10) |       |
| <b>&gt;18 years</b>                             |                                                                    | 4.45 (1.82-10.9)  |       |                                               | 4.70 (1.92-11.5) |       |                                         | 4.78 (1.94-11.8) |                                          | 4.05 (1.62-10.1) |       |
| <b>Male Sex (versus Female)</b>                 |                                                                    | 1.07 (0.81-1.40)  | 0.63  |                                               | 1.06 (0.81-1.39) | 0.67  |                                         | 1.05 (0.80-1.39) | 0.72                                     | 1.08 (0.82-1.42) | 0.56  |
| <b>Hospital Unit/ECMO Mode (ref: CICU)</b>      |                                                                    |                   | <0.01 |                                               |                  | <0.01 |                                         | <0.01            |                                          | <0.01            |       |
| <b>NICU/VV</b>                                  |                                                                    | 0.32 (0.15-0.66)  |       |                                               | 0.32 (0.15-0.67) |       |                                         | 0.31 (0.14-0.67) |                                          | 0.34 (0.16-0.70) |       |
| <b>NICU/VA</b>                                  |                                                                    | 0.45 (0.30-0.69)  |       |                                               | 0.45 (0.29-0.69) |       |                                         | 0.47 (0.30-0.72) |                                          | 0.46 (0.30-0.70) |       |
| <b>PICU/VV</b>                                  |                                                                    | 1.43 (0.80-2.57)  |       |                                               | 1.44 (0.80-2.58) |       |                                         | 1.54 (0.85-2.80) |                                          | 1.51 (0.83-2.73) |       |
| <b>PICU/VA</b>                                  |                                                                    | 2.42 (1.33-4.38)  |       |                                               | 2.34 (1.30-4.23) |       |                                         | 2.40 (1.32-4.36) |                                          | 2.42 (1.34-4.39) |       |
| <b>Abnormal Cr ECMO start</b>                   |                                                                    | 0.87 (0.60, 1.27) | 0.48  |                                               | 0.86 (0.59-1.25) | 0.43  |                                         | 0.83 (0.57-1.21) | 0.33                                     | 0.87 (0.60-1.27) | 0.47  |
| <b>Average pH</b>                               |                                                                    | 0.15 (0.01-1.66)  | 0.12  |                                               | 0.17 (0.02-1.98) | 0.10  |                                         | 0.16 (0.01-2.13) | 0.16                                     | 0.17 (0.01-1.92) | 0.15  |
| <b>Average Lactate</b>                          |                                                                    | 1.12 (1.07-1.17)  | <0.01 |                                               | 1.12 (1.07-1.17) | <0.01 |                                         | 1.12 (1.07-1.17) | <0.01                                    | 1.12 (1.07-1.17) | <0.01 |
| <b>Median MAP<sup>b</sup></b>                   |                                                                    | 0.97 (0.96-0.99)  | <0.01 |                                               | 0.97 (0.96-0.99) | <0.01 |                                         | 0.97 (0.96-0.99) | <0.01                                    | 0.97 (0.96-0.99) | <0.01 |
| <b>Nephrotoxic Medication Count<sup>c</sup></b> |                                                                    | 1.02 (0.85-1.24)  | 0.81  |                                               | 1.03 (0.85-1.24) | 0.78  |                                         | 1.01 (0.84-1.23) | 0.88                                     | 1.02 (0.84-1.23) | 0.85  |

a. Age at time of ECMO start  
b. MAP (mean arterial pressure)  
c. Based on NINJA list of nephrotoxins

**Supplemental Table 2b: Cause-specific cox proportional hazards models for time to composite outcome of stage  $\geq 2$  AKI or RRT using ECMO start creatinine closest in absolute value without priority for pre-ECMO creatinine value**

|                                                 | Model 1: Plasma Free Hemoglobin (mg/dL)<br>(ref: unmeasured value) |                   |       | Model 2: LDH (U/L)<br>(ref: unmeasured value) |                   |       | Model 3: Minimum Platelets (per 100/uL) |                   | Model 4: Minimum Hemoglobin (per 1 g/dl) |                   |       |
|-------------------------------------------------|--------------------------------------------------------------------|-------------------|-------|-----------------------------------------------|-------------------|-------|-----------------------------------------|-------------------|------------------------------------------|-------------------|-------|
|                                                 | HR (95% CI)                                                        |                   | p     | HR (95% CI)                                   |                   | p     | HR (95% CI)                             | p                 | HR (95% CI)                              | p                 |       |
| <b>Hemolysis Marker</b>                         | <50                                                                | 0.83 (0.11-6.31)  | 0.85  | <2500                                         | 0.27 (0.04-2.13)  | 0.21  | 0.97 (0.92-1.02)                        | 0.22              | 0.90 (0.80-1.00)                         | 0.05              |       |
|                                                 | >50                                                                | 6.57 (3.27-13.2)  | <0.01 | >2500                                         | 2.84 (1.45-5.57)  | <0.01 |                                         |                   |                                          |                   |       |
| <b>Age<sup>a</sup> (ref: &lt;1 month)</b>       |                                                                    |                   | 0.28  |                                               |                   | 0.07  |                                         | 0.09              |                                          | 0.40              |       |
| <b>1 month – 1 year</b>                         |                                                                    | 1.19 (0.57-2.48)  |       |                                               | 1.13 (0.54-2.35)  |       |                                         | 1.16 (0.55-2.47)  |                                          | 1.02 (0.49-2.13)  |       |
| <b>&gt;1 year – 5 years</b>                     |                                                                    | 1.62 (0.76-3.45)  |       |                                               | 1.70 (0.81-3.55)  |       |                                         | 1.97 (0.90-4.31)  |                                          | 1.45 (0.68-3.12)  |       |
| <b>&gt;5 years – 12 years</b>                   |                                                                    | 1.94 (0.78-4.83)  |       |                                               | 1.90 (0.76-4.74)  |       |                                         | 2.10 (0.81-5.44)  |                                          | 1.59 (0.64-3.93)  |       |
| <b>&gt;12 years – 18 years</b>                  |                                                                    | 2.61 (1.11-6.13)  |       |                                               | 3.26 (1.41-7.50)  |       |                                         | 3.47 (1.42-8.50)  |                                          | 2.37 (1.00-5.63)  |       |
| <b>&gt;18 years</b>                             |                                                                    | 2.61 (0.88-7.74)  |       |                                               | 2.96 (1.0-8.78)   |       |                                         | 3.04 (1.01-9.13)  |                                          | 2.06 (0.67-6.30)  |       |
| <b>Male Sex (versus Female)</b>                 |                                                                    | 0.93 (0.63-1.37)  | 0.71  |                                               | 0.92 (0.62-1.36)  | 0.67  |                                         | 0.82 (0.55-1.22)  | 0.33                                     | 0.91 (0.62-1.34)  | 0.63  |
| <b>Hospital Unit/ECMO Mode (ref: CICU)</b>      |                                                                    |                   | <0.01 |                                               |                   | <0.01 |                                         | <0.01             |                                          | <0.01             |       |
| <b>NICU/VV</b>                                  |                                                                    | 0.09 (0.01-0.65)  |       |                                               | 0.09 (0.01-0.68)  |       |                                         | 0.10 (0.01-0.75)  |                                          | 0.09 (0.01-0.68)  |       |
| <b>NICU/VA</b>                                  |                                                                    | 0.28 (0.14-0.54)  |       |                                               | 0.28 (0.15-0.54)  |       |                                         | 0.29 (0.14-0.56)  |                                          | 0.27 (0.14-0.53)  |       |
| <b>PICU/VV</b>                                  |                                                                    | 1.56 (0.79-3.11)  |       |                                               | 1.53 (0.76-3.09)  |       |                                         | 1.62 (0.79-3.36)  |                                          | 1.68 (0.82-3.42)  |       |
| <b>PICU/VA</b>                                  |                                                                    | 1.53 (0.68-3.40)  |       |                                               | 1.32 (0.60-2.92)  |       |                                         | 1.48 (0.66-3.33)  |                                          | 1.29 (0.58-2.89)  |       |
| <b>Abnormal Cr ECMO start</b>                   |                                                                    | 1.30 (0.83-2.05)  | 0.25  |                                               | 1.18 (0.75-1.86)  | 0.48  |                                         | 1.16 (0.72-1.87)  | 0.53                                     | 1.28 (0.81-2.02)  | 0.29  |
| <b>Average pH</b>                               |                                                                    | 0.01 (<0.01-0.18) | <0.01 |                                               | 0.01 (<0.01-0.26) | <0.01 |                                         | 0.02 (<0.01-0.41) | 0.01                                     | 0.01 (<0.01-0.23) | <0.01 |
| <b>Average Lactate</b>                          |                                                                    | 1.17 (1.11-1.23)  | <0.01 |                                               | 1.16 (1.10-1.22)  | <0.01 |                                         | 1.16 (1.10-1.23)  | <0.01                                    | 1.16 (1.10-1.22)  | <0.01 |
| <b>Median MAP<sup>b</sup></b>                   |                                                                    | 0.99 (0.97-1.01)  | 0.26  |                                               | 0.99 (0.97-1.01)  | 0.28  |                                         | 0.98 (0.96-1.01)  | 0.20                                     | 0.99 (0.97-1.01)  | 0.46  |
| <b>Nephrotoxic Medication Count<sup>c</sup></b> |                                                                    | 0.82 (0.62-1.08)  | 0.16  |                                               | 0.83 (0.63-1.10)  | 0.19  |                                         | 0.81 (0.61-1.08)  | 0.15                                     | 0.81 (0.61-1.08)  | 0.15  |

a. Age at time of ECMO start  
b. MAP (mean arterial pressure)  
c. Based on NINJA list of nephrotoxins



**Supplemental Table 3a: Cause-specific cox proportional hazards models for time to composite outcome of any stage AKI or RRT excluding patients without a serum creatinine value obtained in the 72 hours pre-ECMO**

|                                                 | Model 1: Plasma Free Hemoglobin (mg/dL)<br>(ref: unmeasured value) |       |  | Model 2: LDH (U/L)<br>(ref: unmeasured value) |       |  | Model 3: Minimum Platelets (per 100/uL) |       | Model 4: Minimum Hemoglobin (per 1 g/dl) |       |
|-------------------------------------------------|--------------------------------------------------------------------|-------|--|-----------------------------------------------|-------|--|-----------------------------------------|-------|------------------------------------------|-------|
|                                                 | HR (95% CI)                                                        | p     |  | HR (95% CI)                                   | p     |  | HR (95% CI)                             | p     | HR (95% CI)                              | p     |
| <b>Hemolysis Marker</b>                         | <50 1.13 (0.26-4.87)                                               | 0.87  |  | <2500 0.82 (0.20-3.41)                        | 0.78  |  | 0.97 (0.94-1.01)                        | 0.16  | 0.97 (0.90-1.05)                         | 0.50  |
|                                                 | >50 2.62 (1.27-5.41)                                               | 0.01  |  | >2500 2.96 (1.66-5.31)                        | <0.01 |  |                                         |       |                                          |       |
| <b>Age<sup>a</sup> (ref: &lt;1 month)</b>       |                                                                    | 0.05  |  |                                               | 0.02  |  |                                         | 0.06  |                                          | 0.04  |
| <b>1 month – 1 year</b>                         | 1.59 (0.96-2.63)                                                   |       |  | 1.55 (0.94-2.56)                              |       |  | 1.61 (0.97-2.68)                        |       | 1.59 (0.96-2.64)                         |       |
| <b>&gt;1 year – 5 years</b>                     | 1.24 (0.68-2.26)                                                   |       |  | 1.22 (0.67-2.20)                              |       |  | 1.38 (0.75-2.54)                        |       | 1.28 (0.70-2.35)                         |       |
| <b>&gt;5 years – 12 years</b>                   | 1.77 (0.89-3.51)                                                   |       |  | 1.69 (0.85-3.34)                              |       |  | 2.07 (1.03-4.18)                        |       | 1.77 (0.88-3.56)                         |       |
| <b>&gt;12 years – 18 years</b>                  | 2.71 (1.40-5.26)                                                   |       |  | 2.91 (1.52-5.56)                              |       |  | 2.98 (1.51-5.88)                        |       | 2.77 (1.41-5.42)                         |       |
| <b>&gt;18 years</b>                             | 2.53 (0.97-6.54)                                                   |       |  | 2.69 (1.04-6.96)                              |       |  | 2.62 (1.01-6.79)                        |       | 2.53 (0.95-6.72)                         |       |
| <b>Male Sex (versus Female)</b>                 | 1.04 (0.78-1.38)                                                   | 0.79  |  | 1.04 (0.79-1.38)                              | 0.76  |  | 1.04 (0.87-2.94)                        | 0.80  | 1.06 (0.80-1.41)                         | 0.67  |
| <b>Hospital Unit/ECMO Mode (ref: CICU)</b>      |                                                                    | <0.01 |  |                                               | <0.01 |  |                                         | <0.01 |                                          | <0.01 |
| <b>NICU/VV</b>                                  | 0.29 (0.14-0.60)                                                   |       |  | 0.29 (0.14-0.61)                              |       |  | 0.28 (0.13-0.61)                        |       | 0.30 (0.14-0.63)                         |       |
| <b>NICU/VA</b>                                  | 0.42 (0.27-0.65)                                                   |       |  | 0.42 (0.27-0.65)                              |       |  | 0.43 (0.27-0.67)                        |       | 0.42 (0.27-0.65)                         |       |
| <b>PICU/VV</b>                                  | 1.13 (0.63-2.01)                                                   |       |  | 1.14 (0.64-2.04)                              |       |  | 1.21 (0.67-2.19)                        |       | 1.15 (0.64-2.06)                         |       |
| <b>PICU/VA</b>                                  | 1.61 (0.88-2.96)                                                   |       |  | 1.58 (0.86-2.90)                              |       |  | 1.60 (1.32-4.36)                        |       | 1.55 (0.85-2.85)                         |       |
| <b>Abnormal Cr ECMO start</b>                   | 0.81 (0.57, 1.16)                                                  | 0.26  |  | 0.78 (0.55-1.12)                              | 0.18  |  | 0.79 (0.55-1.13)                        | 0.20  | 0.82 (0.57-1.17)                         | 0.27  |
| <b>Average pH</b>                               | 0.24 (0.03-2.27)                                                   | 0.21  |  | 0.26 (0.03-2.50)                              | 0.24  |  | 0.23 (0.02-2.48)                        | 0.22  | 0.25 (0.03-2.37)                         | 0.23  |
| <b>Average Lactate</b>                          | 1.11 (1.07-1.16)                                                   | <0.01 |  | 1.10 (1.06-1.15)                              | <0.01 |  | 1.11 (1.06-1.16)                        | <0.01 | 1.11 (1.06-1.15)                         | <0.01 |
| <b>Median MAP<sup>b</sup></b>                   | 0.99 (0.97-1.00)                                                   | 0.16  |  | 0.99 (0.97-1.00)                              | 0.16  |  | 0.99 (0.97-1.01)                        | 0.18  | 0.99 (0.97-1.00)                         | 0.13  |
| <b>Nephrotoxic Medication Count<sup>c</sup></b> | 0.96 (0.79-1.17)                                                   | 0.71  |  | 0.97 (0.80-1.18)                              | 0.80  |  | 0.96 (0.78-1.16)                        | 0.65  | 0.96 (0.79-1.17)                         | 0.71  |

a. Age at time of ECMO start  
b. MAP (mean arterial pressure)  
c. Based on NINJA list of nephrotoxins

**Supplemental Table 3b: Cause-specific cox proportional hazards models for time to composite outcome of any ≥ stage 2 AKI or RRT excluding patients without a serum creatinine value obtained in the 72 hours pre-ECMO**

|                                                 | Model 1: Plasma Free Hemoglobin (mg/dL)<br>(ref: unmeasured value) |       |  | Model 2: LDH (U/L)<br>(ref: unmeasured value) |       |  | Model 3: Minimum Platelets (per 100/uL) |       | Model 4: Minimum Hemoglobin (per 1 g/dl) |       |
|-------------------------------------------------|--------------------------------------------------------------------|-------|--|-----------------------------------------------|-------|--|-----------------------------------------|-------|------------------------------------------|-------|
|                                                 | HR (95% CI)                                                        | p     |  | HR (95% CI)                                   | p     |  | HR (95% CI)                             | p     | HR (95% CI)                              | p     |
| <b>Hemolysis Marker</b>                         | <50 0.70 (0.09-5.40)                                               | 0.73  |  | <2500 0.28 (0.04-2.21)                        | 0.23  |  | 0.97 (0.92-1.03)                        | 0.34  | 0.89 (0.80-1.00)                         | 0.04  |
|                                                 | >50 5.39 (2.47-11.7)                                               | <0.01 |  | >2500 2.54 (1.26-5.12)                        | 0.01  |  |                                         |       |                                          |       |
| <b>Age<sup>a</sup> (ref: &lt;1 month)</b>       |                                                                    | 0.21  |  |                                               | 0.06  |  |                                         | 0.08  |                                          | 0.32  |
| <b>1 month – 1 year</b>                         | 1.26 (0.57-2.77)                                                   |       |  | 1.16 (0.53-2.55)                              |       |  | 1.23 (0.55-2.78)                        |       | 1.07 (0.48-2.35)                         |       |
| <b>&gt;1 year – 5 years</b>                     | 1.63 (0.73-3.63)                                                   |       |  | 1.66 (0.76-3.64)                              |       |  | 1.98 (0.85-4.60)                        |       | 1.45 (0.64-3.29)                         |       |
| <b>&gt;5 years – 12 years</b>                   | 2.23 (0.88-5.62)                                                   |       |  | 2.15 (0.85-5.45)                              |       |  | 2.46 (0.93-6.53)                        |       | 1.81 (0.71-4.58)                         |       |
| <b>&gt;12 years – 18 years</b>                  | 2.96 (1.23-7.11)                                                   |       |  | 3.52 (1.50-8.23)                              |       |  | 3.89 (1.56-9.71)                        |       | 2.63 (1.09-6.32)                         |       |
| <b>&gt;18 years</b>                             | 2.65 (0.80-8.84)                                                   |       |  | 2.86 (0.86-9.44)                              |       |  | 2.99 (0.89-10.0)                        |       | 1.89 (0.54-6.55)                         |       |
| <b>Male Sex (versus Female)</b>                 | 0.85 (0.56-1.29)                                                   | 0.44  |  | 0.84 (0.56-1.28)                              | 0.43  |  | 0.76 (0.49-1.16)                        | 0.20  | 0.85 (0.56-1.29)                         | 0.45  |
| <b>Hospital Unit/ECMO Mode (ref: CICU)</b>      |                                                                    | <0.01 |  |                                               | <0.01 |  |                                         | <0.01 |                                          | <0.01 |
| <b>NICU/VV</b>                                  | <0.01 (0.00-0.01)                                                  |       |  | <0.01 (0.00-0.01)                             |       |  | <0.01 (0.00-0.01)                       |       | <0.01 (0.00-0.01)                        |       |
| <b>NICU/VA</b>                                  | 0.26 (0.13-0.55)                                                   |       |  | 0.26 (0.13-0.53)                              |       |  | 0.27 (0.13-0.57)                        |       | 0.26 (0.13-0.54)                         |       |
| <b>PICU/VV</b>                                  | 1.43 (0.70-2.91)                                                   |       |  | 1.44 (0.70-2.95)                              |       |  | 1.49 (0.70-3.14)                        |       | 1.58 (0.76-3.28)                         |       |
| <b>PICU/VA</b>                                  | 1.41 (0.61-3.24)                                                   |       |  | 1.26 (0.55-2.88)                              |       |  | 1.44 (0.62-3.33)                        |       | 1.29 (0.56-2.98)                         |       |
| <b>Abnormal Cr ECMO start</b>                   | 1.32 (0.83-2.11)                                                   | 0.24  |  | 1.19 (0.74-1.90)                              | 0.47  |  | 1.19 (0.73-1.93)                        | 0.49  | 1.30 (0.82-2.08)                         | 0.27  |
| <b>Average pH</b>                               | 0.01 (<0.01-0.17)                                                  | <0.01 |  | 0.01 (<0.01-0.21)                             | <0.01 |  | 0.01 (<0.01-0.37)                       | 0.01  | 0.01 (<0.01-0.20)                        | <0.01 |
| <b>Average Lactate</b>                          | 1.16 (1.10-1.23)                                                   | <0.01 |  | 1.16 (1.09-1.22)                              | <0.01 |  | 1.16 (1.10-1.23)                        | <0.01 | 1.16 (1.10-1.22)                         | <0.01 |
| <b>Median MAP<sup>b</sup></b>                   | 0.98 (0.96-1.01)                                                   | 0.20  |  | 0.98 (0.96-1.01)                              | 0.20  |  | 0.98 (0.96-1.01)                        | 0.13  | 0.99 (0.97-1.01)                         | 0.35  |
| <b>Nephrotoxic Medication Count<sup>c</sup></b> | 0.76 (0.56-1.02)                                                   | 0.07  |  | 0.77 (0.57-1.03)                              | 0.08  |  | 0.75 (0.55-1.01)                        | 0.06  | 0.75 (0.56-1.01)                         | 0.06  |

a. Age at time of ECMO start  
b. MAP (mean arterial pressure)  
c. Based on NINJA list of nephrotoxins

**Supplemental Table 4a: Cause-specific cox proportional hazards models for time to composite outcome of all stage AKI or RRT using all eligible ECMO runs, with a single patient contributing multiple runs**

|                                                 | Model 1: Plasma Free Hemoglobin (mg/dL)<br>(ref: unmeasured value) |       |  | Model 2: LDH (U/L)<br>(ref: unmeasured value) |       |  | Model 3: Minimum Platelets (per 100/uL) |       | Model 4: Minimum Hemoglobin (per 1 g/dl) |       |
|-------------------------------------------------|--------------------------------------------------------------------|-------|--|-----------------------------------------------|-------|--|-----------------------------------------|-------|------------------------------------------|-------|
|                                                 | HR (95% CI)                                                        | p     |  | HR (95% CI)                                   | p     |  | HR (95% CI)                             | p     | HR (95% CI)                              | p     |
| <b>Hemolysis Marker</b>                         | <50 1.09 (0.20-5.80) 0.92                                          |       |  | <2500 0.78 (0.17-3.56) 0.75                   |       |  | 0.96 (0.93-1.00) 0.07                   |       | 0.97 (0.89-1.06) 0.49                    |       |
|                                                 | >50 2.68 (1.50-4.78) <0.01                                         |       |  | >2500 2.86 (1.82-4.51) <0.01                  |       |  |                                         |       |                                          |       |
| <b>Age<sup>a</sup> (ref: &lt;1 month)</b>       |                                                                    | 0.05  |  |                                               | 0.02  |  |                                         | 0.03  |                                          | 0.08  |
| <b>1 month – 1 year</b>                         | 1.67 (1.04-2.68)                                                   |       |  | 1.64 (1.03-2.63)                              |       |  | 1.71 (1.06-2.74)                        |       | 1.66 (1.03-2.69)                         |       |
| <b>&gt;1 year – 5 years</b>                     | 1.45 (0.89-2.38)                                                   |       |  | 1.43 (0.88-2.32)                              |       |  | 1.60 (0.97-2.65)                        |       | 1.47 (0.89-2.45)                         |       |
| <b>&gt;5 years – 12 years</b>                   | 1.80 (0.92-3.54)                                                   |       |  | 1.76 (0.91-3.40)                              |       |  | 2.28 (1.15-4.52)                        |       | 1.87 (0.94-3.74)                         |       |
| <b>&gt;12 years – 18 years</b>                  | 2.91 (1.46-5.80)                                                   |       |  | 3.10 (1.59-6.03)                              |       |  | 3.27 (1.55-6.90)                        |       | 2.93 (1.40-6.11)                         |       |
| <b>&gt;18 years</b>                             | 2.38 (1.04-5.45)                                                   |       |  | 2.52 (1.10-5.76)                              |       |  | 2.53 (1.07-5.96)                        |       | 2.36 (0.99-5.60)                         |       |
| <b>Male Sex (versus Female)</b>                 | 1.13 (0.87-1.46) 0.37                                              |       |  | 1.13 (0.87-1.47) 0.36                         |       |  | 1.11 (0.85-1.46) 0.43                   |       | 1.15 (0.88-1.50) 0.30                    |       |
| <b>Hospital Unit/ECMO Mode (ref: CICU)</b>      |                                                                    | <0.01 |  |                                               | <0.01 |  |                                         | <0.01 |                                          | <0.01 |
| <b>NICU/VV</b>                                  | 0.28 (0.13-0.60)                                                   |       |  | 0.29 (0.13-0.62)                              |       |  | 0.27 (0.12-0.61)                        |       | 0.29 (0.14-0.63)                         |       |
| <b>NICU/VA</b>                                  | 0.40 (0.26-0.62)                                                   |       |  | 0.40 (0.26-0.62)                              |       |  | 0.41 (0.26-0.64)                        |       | 0.40 (0.26-0.62)                         |       |
| <b>PICU/VV</b>                                  | 1.10 (0.63-1.91)                                                   |       |  | 1.11 (0.63-1.95)                              |       |  | 1.17 (0.65-2.12)                        |       | 1.11 (0.62-1.99)                         |       |
| <b>PICU/VA</b>                                  | 1.70 (0.87-3.31)                                                   |       |  | 1.66 (0.85-3.22)                              |       |  | 1.64 (0.83-3.23)                        |       | 1.63 (0.83-3.21)                         |       |
| <b>Abnormal Cr ECMO start</b>                   | 0.77 (0.55-1.09) 0.15                                              |       |  | 0.75 (0.53-1.06) 0.10                         |       |  | 0.76 (0.53-1.07) 0.12                   |       | 0.79 (0.55-1.11) 0.18                    |       |
| <b>Average pH</b>                               | 0.33 (0.03-3.56) 0.36                                              |       |  | 0.36 (0.04-3.67) 0.39                         |       |  | 0.34 (0.03-4.22) 0.40                   |       | 0.36 (0.03-3.82) 0.39                    |       |
| <b>Average Lactate</b>                          | 1.12 (1.07-1.17) <0.01                                             |       |  | 1.11 (1.07-1.16) <0.01                        |       |  | 1.12 (1.07-1.17) <0.01                  |       | 1.11 (1.07-1.17) <0.01                   |       |
| <b>Median MAP<sup>b</sup></b>                   | 0.99 (0.97-1.01) 0.19                                              |       |  | 0.99 (0.97-1.01) 0.18                         |       |  | 0.99 (0.97-1.01) 0.20                   |       | 0.99 (0.97-1.00) 0.16                    |       |
| <b>Nephrotoxic Medication Count<sup>c</sup></b> | 1.04 (0.87-1.24) 0.65                                              |       |  | 1.05 (0.89-1.25) 0.56                         |       |  | 1.04 (0.87-1.24) 0.69                   |       | 1.05 (0.88-1.25) 0.61                    |       |

a. Age at time of ECMO start  
b. MAP (mean arterial pressure)  
c. Based on NINJA list of nephrotoxins

**Supplemental Table 4b: Cause-specific cox proportional hazards models for time to composite outcome of stage ≥2 AKI or RRT using all eligible ECMO runs, with a single patient contributing multiple runs**

|                                                 | Model 1: Plasma Free Hemoglobin (mg/dL)<br>(ref: unmeasured value) |       |  | Model 2: LDH (U/L)<br>(ref: unmeasured value) |       |  | Model 3: Minimum Platelets (per 100/uL) |       | Model 4: Minimum Hemoglobin (per 1 g/dl) |       |
|-------------------------------------------------|--------------------------------------------------------------------|-------|--|-----------------------------------------------|-------|--|-----------------------------------------|-------|------------------------------------------|-------|
|                                                 | HR (95% CI)                                                        | p     |  | HR (95% CI)                                   | p     |  | HR (95% CI)                             | p     | HR (95% CI)                              | p     |
| <b>Hemolysis Marker</b>                         | <50 0.84 (0.12-5.92) 0.86                                          |       |  | <2500 0.24 (0.02-2.47) 0.23                   |       |  | 0.95 (0.90-1.01) 0.09                   |       | 0.91 (0.81-1.03) 0.14                    |       |
|                                                 | >50 6.71 (3.51-12.8) <0.01                                         |       |  | >2500 3.21 (1.64-6.29) <0.01                  |       |  |                                         |       |                                          |       |
| <b>Age<sup>a</sup> (ref: &lt;1 month)</b>       |                                                                    | 0.28  |  |                                               | 0.05  |  |                                         | 0.07  |                                          | 0.39  |
| <b>1 month – 1 year</b>                         | 1.41 (0.71-2.81)                                                   |       |  | 1.36 (0.69-2.70)                              |       |  | 1.41 (0.70-2.83)                        |       | 1.23 (0.61-2.49)                         |       |
| <b>&gt;1 year – 5 years</b>                     | 1.67 (0.83-3.36)                                                   |       |  | 1.79 (0.86-3.71)                              |       |  | 2.18 (1.06-4.48)                        |       | 1.59 (0.77-3.27)                         |       |
| <b>&gt;5 years – 12 years</b>                   | 1.69 (0.68-4.17)                                                   |       |  | 1.82 (0.73-4.54)                              |       |  | 2.31 (0.87-6.17)                        |       | 1.63 (0.63-4.22)                         |       |
| <b>&gt;12 years – 18 years</b>                  | 2.66 (1.14-6.22)                                                   |       |  | 3.48 (1.55-7.79)                              |       |  | 3.83 (1.54-9.56)                        |       | 2.61 (1.08-6.32)                         |       |
| <b>&gt;18 years</b>                             | 2.59 (1.00-6.73)                                                   |       |  | 3.03 (1.14-8.06)                              |       |  | 3.08 (1.00-9.47)                        |       | 2.17 (0.72-6.55)                         |       |
| <b>Male Sex (versus Female)</b>                 | 0.88 (0.61-1.28) 0.50                                              |       |  | 0.86 (0.59-1.26) 0.44                         |       |  | 0.76 (0.52-1.12) 0.17                   |       | 0.87 (0.59-1.27) 0.46                    |       |
| <b>Hospital Unit/ECMO Mode (ref: CICU)</b>      |                                                                    | <0.01 |  |                                               | <0.01 |  |                                         | <0.01 |                                          | <0.01 |
| <b>NICU/VV</b>                                  | 0.09 (0.01-0.69)                                                   |       |  | 0.09 (0.01-0.73)                              |       |  | 0.10 (0.01-0.82)                        |       | 0.09 (0.01-0.72)                         |       |
| <b>NICU/VA</b>                                  | 0.29 (0.15-0.54)                                                   |       |  | 0.29 (0.16-0.55)                              |       |  | 0.30 (0.16-0.57)                        |       | 0.28 (0.15-0.53)                         |       |
| <b>PICU/VV</b>                                  | 1.62 (0.82-3.19)                                                   |       |  | 1.55 (0.78-3.09)                              |       |  | 1.56 (0.73-3.35)                        |       | 1.65 (0.80-3.38)                         |       |
| <b>PICU/VA</b>                                  | 1.55 (0.62-3.83)                                                   |       |  | 1.31 (0.52-3.31)                              |       |  | 1.41 (0.54-3.65)                        |       | 1.28 (0.50-3.30)                         |       |
| <b>Abnormal Cr ECMO start</b>                   | 1.23 (0.80-1.87) 0.34                                              |       |  | 1.09 (0.71-1.68) 0.68                         |       |  | 1.09 (0.71-1.69) 0.69                   |       | 1.19 (0.77-1.83) 0.44                    |       |
| <b>Average pH</b>                               | 0.01 (<0.01-0.20) <0.01                                            |       |  | 0.01 (<0.01-0.27) 0.01                        |       |  | 0.01 (<0.01-0.43) 0.02                  |       | 0.01 (<0.01-0.27) 0.01                   |       |
| <b>Average Lactate</b>                          | 1.17 (1.11-1.23) <0.01                                             |       |  | 1.16 (1.10-1.22) <0.01                        |       |  | 1.16 (1.10-1.23) <0.01                  |       | 1.16 (1.10-1.22) <0.01                   |       |
| <b>Median MAP<sup>b</sup></b>                   | 0.99 (0.96-1.01) 0.31                                              |       |  | 0.99 (0.96-1.01) 0.30                         |       |  | 0.99 (0.96-1.01) 0.26                   |       | 0.99 (0.96-1.02) 0.44                    |       |
| <b>Nephrotoxic Medication Count<sup>c</sup></b> | 0.80 (0.62-1.02) 0.07                                              |       |  | 0.81 (0.63-1.04) 0.09                         |       |  | 0.78 (0.59-1.02) 0.07                   |       | 0.79 (0.61-1.02) 0.07                    |       |

a. Age at time of ECMO start  
b. MAP (mean arterial pressure)  
c. Based on NINJA list of nephrotoxins

**Supplemental Table 5a: Cause-specific cox proportional hazards models for time to composite outcome of all stage AKI or RRT after excluding patients with diagnosis code(s) consistent with CKD and known baseline eGFR <90 mL/min/1.73 m<sup>2</sup>**

|                                                 | Model 1: Plasma Free Hemoglobin (mg/dL)<br>(ref: unmeasured value) |                  |       | Model 2: LDH (U/L)<br>(ref: unmeasured value) |                  |       | Model 3: Minimum Platelets (per 100/uL) |                  | Model 4: Minimum Hemoglobin (per 1 g/dl) |                  |
|-------------------------------------------------|--------------------------------------------------------------------|------------------|-------|-----------------------------------------------|------------------|-------|-----------------------------------------|------------------|------------------------------------------|------------------|
|                                                 | HR (95% CI)                                                        |                  | p     | HR (95% CI)                                   |                  | p     | HR (95% CI)                             | p                | HR (95% CI)                              | p                |
| <b>Hemolysis Marker</b>                         | <50                                                                | 1.19 (0.28-5.12) | 0.81  | <2500                                         | 0.80 (0.19-3.34) | 0.76  | 0.96 (0.93-1.00)                        | 0.06             | 0.96 (0.89-1.04)                         | 0.35             |
|                                                 | >50                                                                | 2.79 (1.35-5.75) | 0.01  | >2500                                         | 3.09 (1.73-5.52) | <0.01 |                                         |                  |                                          |                  |
| <b>Age<sup>a</sup> (ref: &lt;1 month)</b>       |                                                                    |                  | 0.05  |                                               |                  | 0.02  |                                         | 0.02             |                                          | 0.06             |
| <b>1 month – 1 year</b>                         |                                                                    | 1.61 (1.00-2.61) |       |                                               | 1.59 (0.98-2.57) |       |                                         | 1.65 (1.02-2.68) |                                          | 1.61 (0.99-2.61) |
| <b>&gt;1 year – 5 years</b>                     |                                                                    | 1.39 (0.81-2.40) |       |                                               | 1.38 (0.80-2.37) |       |                                         | 1.55 (0.90-2.69) |                                          | 1.41 (0.81-2.44) |
| <b>&gt;5 years – 12 years</b>                   |                                                                    | 2.00 (1.03-3.89) |       |                                               | 1.89 (0.97-3.68) |       |                                         | 2.36 (1.20-4.66) |                                          | 1.93 (0.98-3.81) |
| <b>&gt;12 years – 18 years</b>                  |                                                                    | 2.76 (1.43-5.31) |       |                                               | 3.04 (1.60-5.76) |       |                                         | 3.13 (1.60-6.12) |                                          | 2.77 (1.43-5.39) |
| <b>&gt;18 years</b>                             |                                                                    | 2.45 (1.02-5.91) |       |                                               | 2.63 (1.09-6.32) |       |                                         | 2.62 (1.09-6.34) |                                          | 2.39 (0.97-5.89) |
| <b>Male Sex (versus Female)</b>                 |                                                                    | 1.14 (0.87-1.48) | 0.35  |                                               | 1.14 (0.87-1.49) | 0.34  |                                         | 1.13 (0.86-1.48) | 0.39                                     | 1.16 (0.88-1.51) |
| <b>Hospital Unit/ECMO Mode (ref: CICU)</b>      |                                                                    |                  | <0.01 |                                               |                  | <0.01 |                                         | <0.01            |                                          | <0.01            |
| <b>NICU/VV</b>                                  |                                                                    | 0.29 (0.14-0.59) |       |                                               | 0.29 (0.14-0.61) |       |                                         | 0.28 (0.13-0.60) |                                          | 0.30 (0.14-0.62) |
| <b>NICU/VA</b>                                  |                                                                    | 0.40 (0.26-0.60) |       |                                               | 0.40 (0.26-0.60) |       |                                         | 0.41 (0.27-0.63) |                                          | 0.40 (0.26-0.61) |
| <b>PICU/VV</b>                                  |                                                                    | 1.20 (0.67-2.14) |       |                                               | 1.18 (0.66-2.10) |       |                                         | 1.27 (0.71-2.30) |                                          | 1.21 (0.67-2.17) |
| <b>PICU/VA</b>                                  |                                                                    | 1.92 (1.07-3.42) |       |                                               | 1.86 (1.04-3.31) |       |                                         | 1.86 (1.03-3.33) |                                          | 1.83 (1.03-3.27) |
| <b>Abnormal Cr ECMO start</b>                   |                                                                    | 0.78 (0.55-1.11) | 0.16  |                                               | 0.74 (0.52-1.06) | 0.10  |                                         | 0.75 (0.52-1.07) | 0.11                                     | 0.78 (0.55-1.11) |
| <b>Average pH</b>                               |                                                                    | 0.35 (0.04-3.18) | 0.35  |                                               | 0.37 (0.04-3.45) | 0.38  |                                         | 0.34 (0.03-3.69) | 0.38                                     | 0.37 (0.04-3.35) |
| <b>Average Lactate</b>                          |                                                                    | 1.11 (1.07-1.16) | <0.01 |                                               | 1.11 (1.06-1.15) | <0.01 |                                         | 1.11 (1.06-1.16) | <0.01                                    | 1.11 (1.07-1.16) |
| <b>Median MAP<sup>b</sup></b>                   |                                                                    | 0.99 (0.97-1.00) | 0.11  |                                               | 0.99 (0.97-1.00) | 0.11  |                                         | 0.99 (0.97-1.00) | 0.13                                     | 0.99 (0.97-1.00) |
| <b>Nephrotoxic Medication Count<sup>c</sup></b> |                                                                    | 1.01 (0.84-1.22) | 0.88  |                                               | 1.02 (0.85-1.23) | 0.80  |                                         | 1.01 (0.83-1.22) | 0.94                                     | 1.01 (0.84-1.22) |

a. Age at time of ECMO start  
b. MAP (mean arterial pressure)  
c. Based on NINJA list of nephrotoxins

**Supplemental Table 5b: Cause-specific cox proportional hazards models for time to composite outcome of stage ≥2 AKI or RRT after excluding patients with diagnosis code(s) consistent with CKD and known baseline eGFR <90 mL/min/1.73 m<sup>2</sup>**

|                                                 | Model 1: Plasma Free Hemoglobin (mg/dL)<br>(ref: unmeasured value) |                   |       | Model 2: LDH (U/L)<br>(ref: unmeasured value) |                   |       | Model 3: Minimum Platelets (per 100/uL) |                   | Model 4: Minimum Hemoglobin (per 1 g/dl) |                   |
|-------------------------------------------------|--------------------------------------------------------------------|-------------------|-------|-----------------------------------------------|-------------------|-------|-----------------------------------------|-------------------|------------------------------------------|-------------------|
|                                                 | HR (95% CI)                                                        |                   | p     | HR (95% CI)                                   |                   | p     | HR (95% CI)                             | p                 | HR (95% CI)                              | p                 |
| <b>Hemolysis Marker</b>                         | <50                                                                | 0.91 (0.12-6.99)  | 0.93  | <2500                                         | 0.29 (0.04-2.32)  | 0.25  | 0.97 (0.92-1.02)                        | 0.23              | 0.90 (0.80-1.00)                         | 0.05              |
|                                                 | >50                                                                | 7.12 (3.53-14.4)  | <0.01 | >2500                                         | 2.86 (1.45-5.64)  | <0.01 |                                         |                   |                                          |                   |
| <b>Age<sup>a</sup> (ref: &lt;1 month)</b>       |                                                                    |                   | 0.37  |                                               |                   | 0.12  |                                         | 0.19              |                                          | 0.52              |
| <b>1 month – 1 year</b>                         |                                                                    | 1.21 (0.58-2.54)  |       |                                               | 1.15 (0.55-2.40)  |       |                                         | 1.13 (0.53-2.41)  |                                          | 1.03 (0.49-2.15)  |
| <b>&gt;1 year – 5 years</b>                     |                                                                    | 1.64 (0.77-3.51)  |       |                                               | 1.74 (0.83-3.65)  |       |                                         | 1.89 (0.86-4.16)  |                                          | 1.48 (0.69-3.20)  |
| <b>&gt;5 years – 12 years</b>                   |                                                                    | 2.01 (0.79-5.09)  |       |                                               | 1.90 (0.74-4.89)  |       |                                         | 2.16 (0.83-5.60)  |                                          | 1.61 (0.64-4.06)  |
| <b>&gt;12 years – 18 years</b>                  |                                                                    | 2.36 (0.98-5.70)  |       |                                               | 3.04 (1.29-7.19)  |       |                                         | 2.92 (1.16-7.36)  |                                          | 2.18 (0.89-5.32)  |
| <b>&gt;18 years</b>                             |                                                                    | 2.68 (0.89-8.00)  |       |                                               | 3.08 (1.03-9.19)  |       |                                         | 2.96 (0.98-8.94)  |                                          | 2.10 (0.68-6.48)  |
| <b>Male Sex (vs. Female)</b>                    |                                                                    | 0.94 (0.63-1.39)  | 0.74  |                                               | 0.93 (0.62-1.38)  | 0.70  |                                         | 0.84 (0.56-1.26)  | 0.40                                     | 0.92 (0.62-1.36)  |
| <b>Hospital Unit/ECMO Mode (ref: CICU)</b>      |                                                                    |                   | <0.01 |                                               |                   | <0.01 |                                         | <0.01             |                                          | <0.01             |
| <b>NICU/VV</b>                                  |                                                                    | 0.00 (0-)         |       |                                               | 0.00 (0-)         |       |                                         | 0.00 (0-)         |                                          | 0.00 (0-)         |
| <b>NICU/VA</b>                                  |                                                                    | 0.28 (0.14-0.54)  |       |                                               | 0.28 (0.14-0.54)  |       |                                         | 0.27 (0.14-0.54)  |                                          | 0.27 (0.14-0.52)  |
| <b>PICU/VV</b>                                  |                                                                    | 1.56 (0.76-3.21)  |       |                                               | 1.50 (0.72-3.11)  |       |                                         | 1.63 (0.77-3.43)  |                                          | 1.66 (0.79-3.50)  |
| <b>PICU/VA</b>                                  |                                                                    | 1.74 (0.78-3.90)  |       |                                               | 1.46 (0.66-3.25)  |       |                                         | 1.63 (0.72-3.68)  |                                          | 1.44 (0.64-3.24)  |
| <b>Abnormal Cr ECMO start</b>                   |                                                                    | 1.30 (0.81-2.08)  | 0.27  |                                               | 1.15 (0.72-1.85)  | 0.55  |                                         | 1.20 (0.74-1.95)  | 0.46                                     | 1.26 (0.79-2.02)  |
| <b>Average pH</b>                               |                                                                    | 0.01 (<0.01-0.16) | <0.01 |                                               | 0.01 (<0.01-0.23) | <0.01 |                                         | 0.01 (<0.01-0.24) | 0.01                                     | 0.01 (<0.01-0.19) |
| <b>Average Lactate</b>                          |                                                                    | 1.16 (1.10-1.23)  | <0.01 |                                               | 1.16 (1.09-1.22)  | <0.01 |                                         | 1.16 (1.09-1.23)  | <0.01                                    | 1.15 (1.09-1.22)  |
| <b>Median MAP<sup>b</sup></b>                   |                                                                    | 0.98 (0.96-1.01)  | 0.19  |                                               | 0.99 (0.96-1.01)  | 0.22  |                                         | 0.98 (0.96-1.01)  | 0.21                                     | 0.99 (0.97-1.01)  |
| <b>Nephrotoxic Medication Count<sup>c</sup></b> |                                                                    | 0.80 (0.60-1.06)  | 0.12  |                                               | 0.81 (0.60-1.08)  | 0.14  |                                         | 0.79 (0.58-1.06)  | 0.11                                     | 0.79 (0.59-1.06)  |

a. Age at time of ECMO start  
b. MAP (mean arterial pressure)  
c. Based on NINJA list of nephrotoxins
